# Supplementary material for: Thermodynamics of cell-penetrating HIV1 TAT peptide insertion into PC/PS/CHOL model bilayers through transmembrane pores: the roles of cholesterol and anionic lipids
Source: Royal Society of Chemistry journal article supplement (doi:10.1039/c5sm01696g), 2016-01-01
Supplement: c5sm01696g1.pdf [file c5sm01696g1.pdf]

Electronic Supplementary Information (ESI)

# Free Energetic Study of Cell-Penetrating HIV-1 TAT Peptide Translocation into DPPC/DPPS/CHOL Bilayers

Yuan Hu and Sandeep Patel\*

*Department of Chemistry and Biochemistry, University of Delaware, Newark, Delaware  
19716, USA*

E-mail: [sapatel@udel.edu](mailto:sapatel@udel.edu)

---

\*To whom correspondence should be addressed

# Charge Density Profile

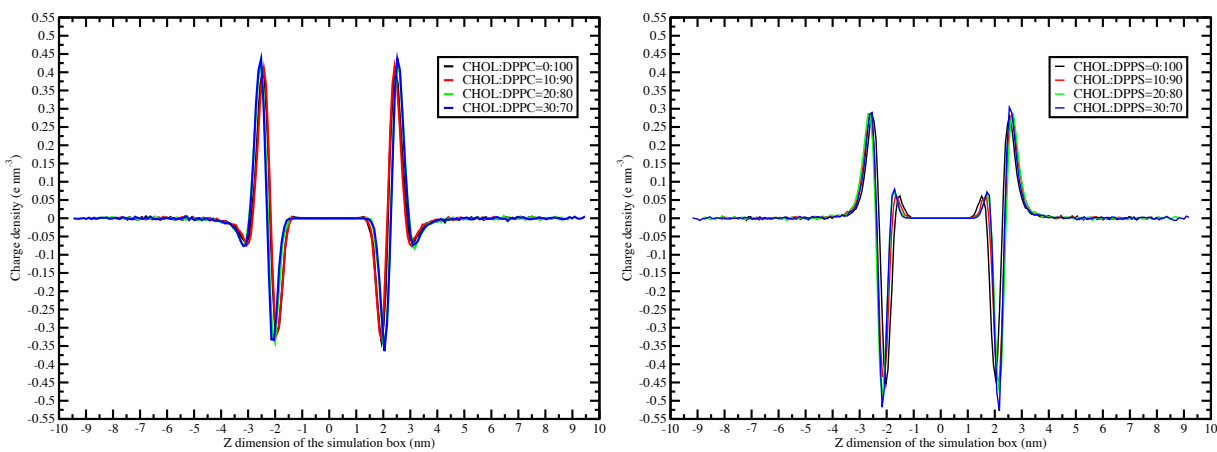

Figure S1: Charge density profiles of (left panel) DPPC systems and (right panel) DPPS systems with 0-30 mol % cholesterol.

# Mass Density Profile

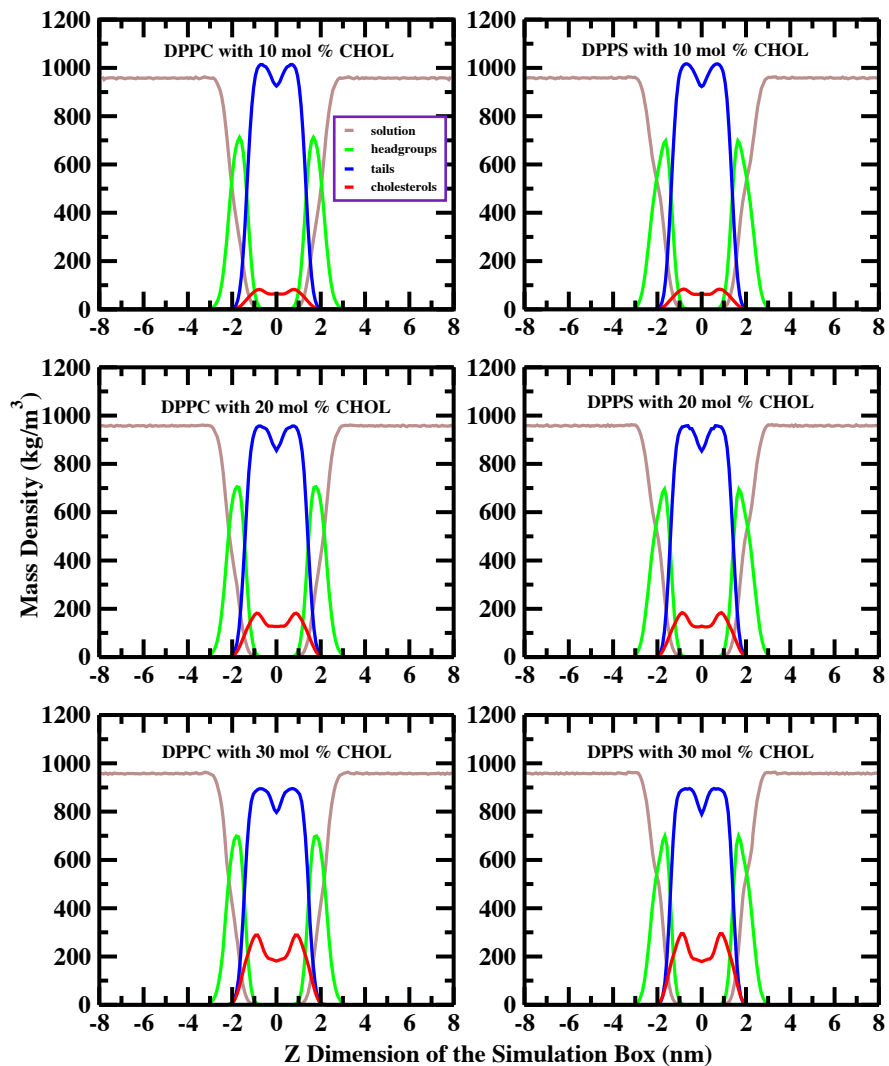

Figure S2: Mass density profiles of (left panels) DPPC systems and (right panels) DPPS systems with 0-30 mol % cholesterol. The densities of water and ion solution, headgroups, tails and cholesterol are shown in each panel.

# Lipid Bond Order Parameter

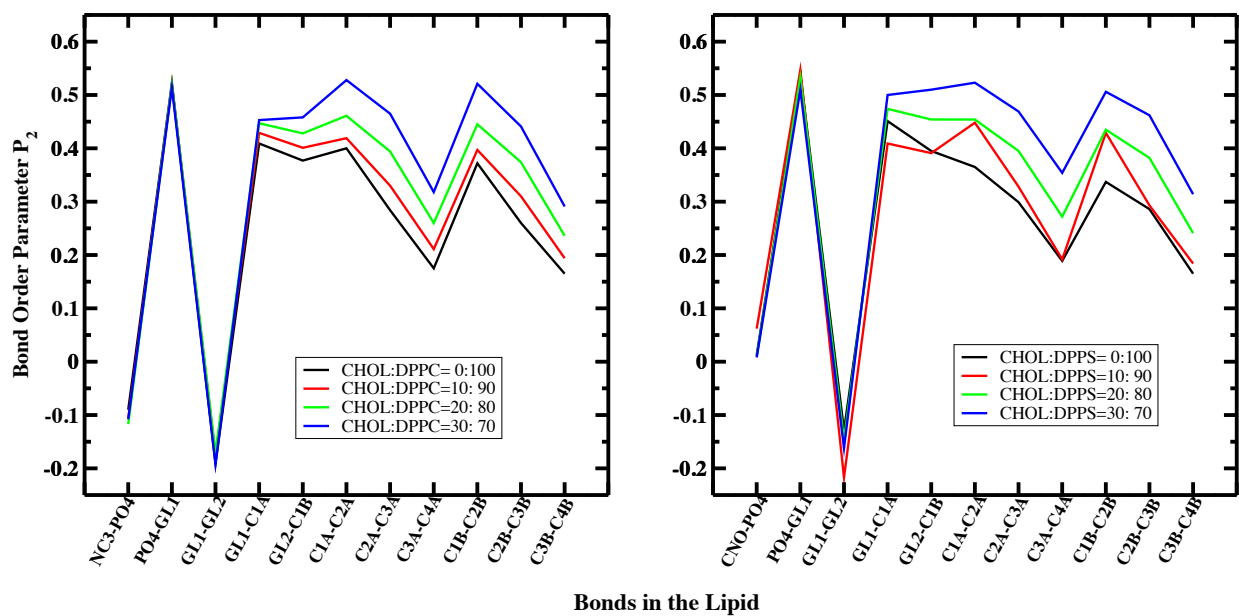

Figure S3: Lipid Bond Order Parameter  $P_2$  of (left panel) DPPC lipid and (right panel) DPPS lipid with 0-30 mol % cholesterol

# PMF Decomposition

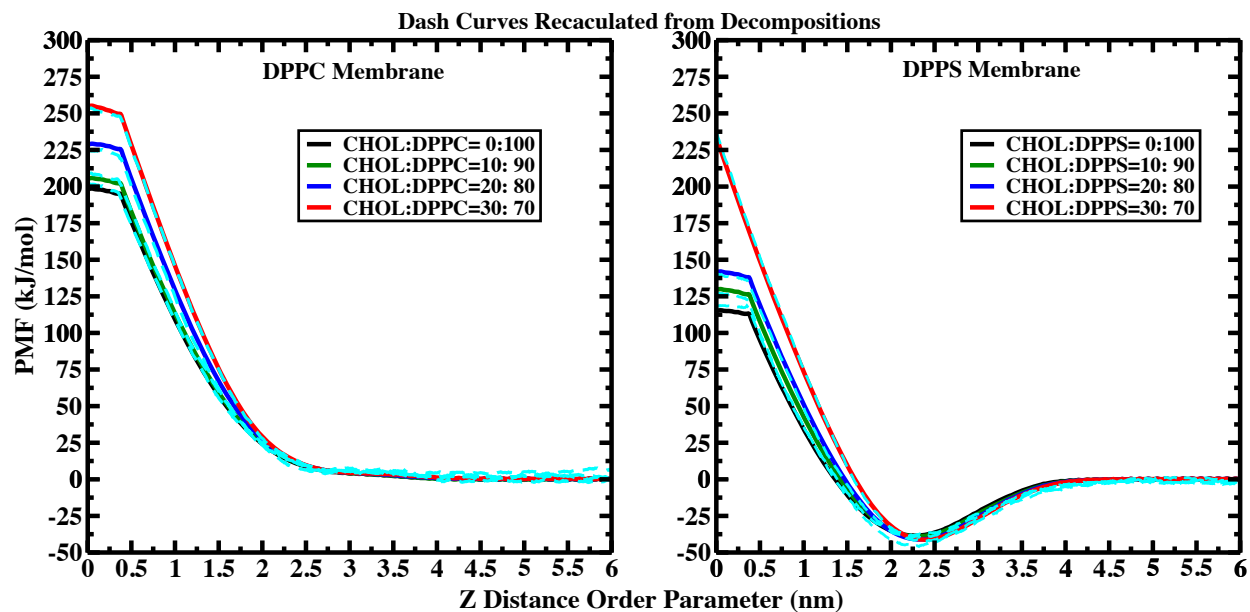

Figure S4: Comparison of total free energy profiles from WHAM calculation (solid curves) and force integration (dash curves). (left panel) TAT penetration into model DPPC lipid bilayers with different percentage of CHOL.(right panel) TAT penetration into model DPPS lipid bilayers with different percentage of CHOL.

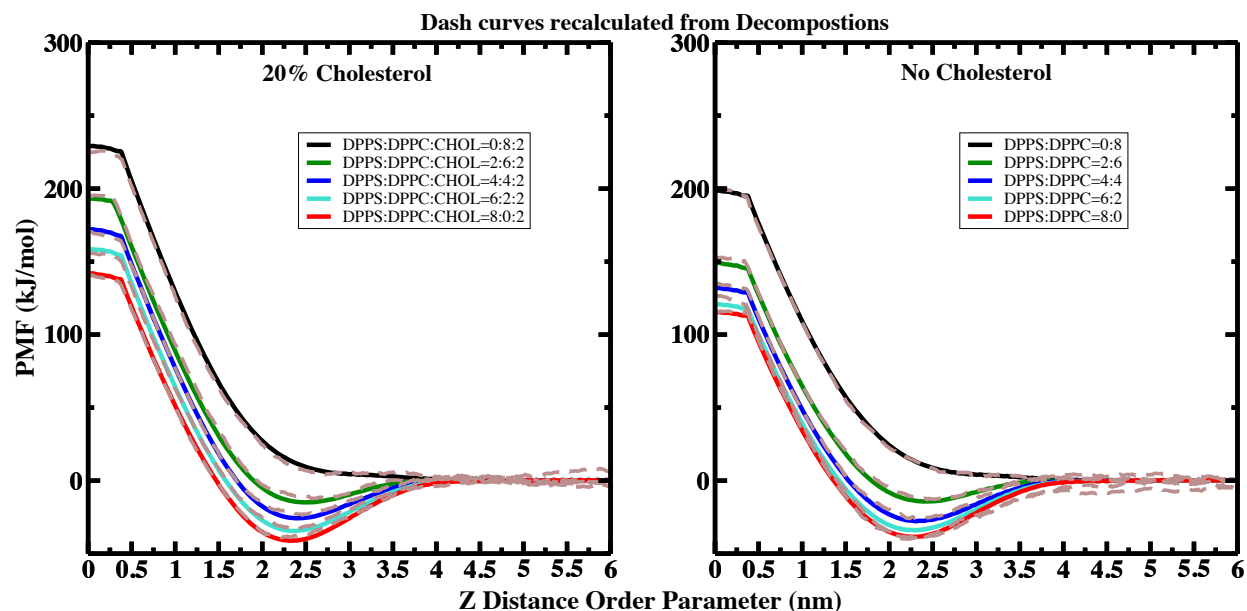

Figure S5: Comparison of total free energy profiles from WHAM calculation (solid curves) and force integration (dash curves). (left panel) 20% CHOL. TAT penetration into model DPPC/DPPS lipid bilayers with different percentage of DPPS. (right panel) NO CHOL. TAT penetration into model DPPC/DPPS lipid bilayers with different percentage of DPPS

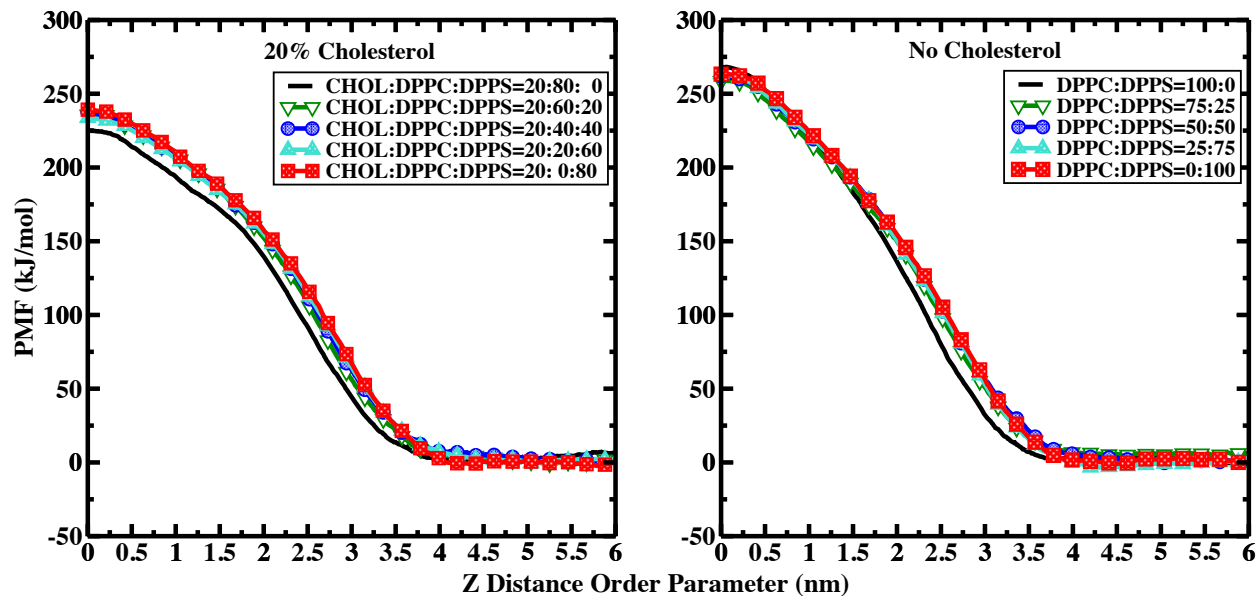

Figure S6: PMF Decomposition: contribution from water in 20% CHOL and no CHOL mixture systems.

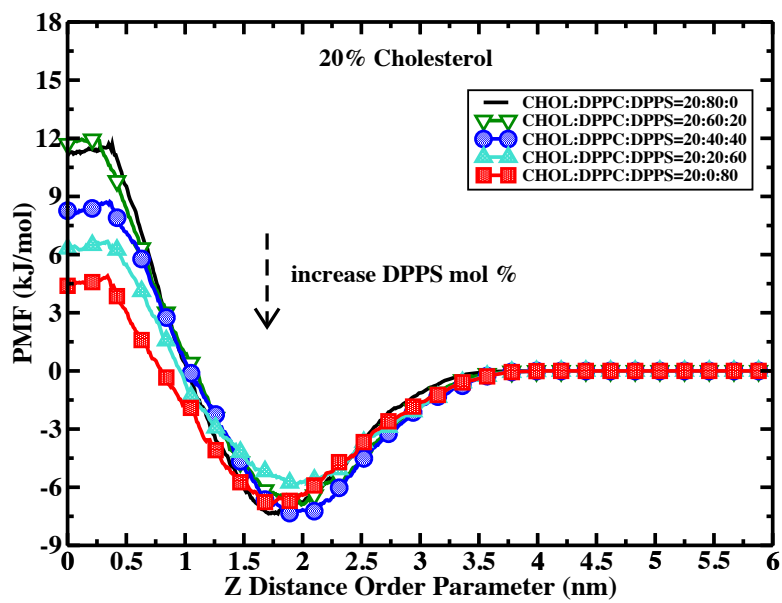

Figure S7: PMF Decomposition: contribution from cholesterol in 20% CHOL systems.
